# Supplementary material for: Resistance Evaluation for Native Potato Accessions against Late Blight Disease and Potato Cyst Nematodes by Molecular Markers and Phenotypic Screening in India
Source: MDPI journal article supplement (doi:10.3390/life13010033), 2022-12-23
Supplement: s1 [file s1]

**Supplementary file S2. A list of 94 native accessions and their collection source in India**

| Sr. No. | Accession        | Collection source<br>(City, State)                 | Hill/Plain |
|---------|------------------|----------------------------------------------------|------------|
| 1.      | Aber Chaibi      | Imphal, Manipur                                    | Hill       |
| 2.      | AGR/56           | Kashmir Valley, Jammu & Kashmir                    | Hill       |
| 3.      | Alpha            | Midnapore, West Bengal                             | Plain      |
| 4.      | Aruconia         | NA                                                 | NA         |
| 5.      | Assamia Aloo     | Jorhat, Assam                                      | Hill       |
| 6.      | Australian White | Midnapore, West Bengal                             | Plain      |
| 7.      | Badami Aloo      | Sonapur, Assam                                     | Hill       |
| 8.      | Bareilly Red     | Bareilly, Uttar Pradesh                            | Plain      |
| 9.      | Beeta            | Gangtok, Sikkim                                    | Hill       |
| 10.     | Bengal Jyoti     | Nalanda, Bihar                                     | Plain      |
| 11.     | Bhura Aloo       | Dholi, Bihar                                       | Plain      |
| 12.     | Brondiar Slave   | Midnapore, West Bengal                             | Plain      |
| 13.     | Burma Special    | Imphal, Manipur                                    | Hill       |
| 14.     | C-9-Patna        | Patna, Bihar                                       | Plain      |
| 15.     | Champaran Lal    | Champaran, Bihar                                   | Plain      |
| 16.     | Clone 1          | Midnapore, West Bengal                             | Plain      |
| 17.     | Dehati Aloo      | Patna , Bihar                                      | Plain      |
| 18.     | Deshla Lal       | Nalanda, Bihar                                     | Plain      |
| 19.     | Desi Aloo        | Chamba, Himachal Pradesh                           | Hill       |
| 20.     | Desi No. 1       | Patna, Bihar                                       | Plain      |
| 21.     | Desi No. 2       | Patna, Bihar                                       | Plain      |
| 22.     | Dhankri or Tumri | Rampur & Kinnaur, Himachal Pradesh                 | Hill       |
| 23.     | DRR Blue         | Allahabad, Uttar Pradesh                           | Plain      |
| 24.     | Dwarf Culture    | Patna, Bihar                                       | Plain      |
| 25.     | G-4              | Farrukhabad, Uttar Pradesh                         | Plain      |
| 26.     | Garlentic        | Kanpur, Uttar Pradesh                              | Plain      |
| 27.     | Gulabia          | Dholi, Bihar                                       | Plain      |
| 28.     | Gulmarg Special  | Gulmarg, Jammu & Kashmir                           | Hill       |
| 29.     | Hamraj Hatti     | Nalanda, Bihar                                     | Plain      |
| 30.     | Hyb-3            | Midnapore, West Bengal                             | Plain      |
| 31.     | Jalandhar        | Jalandhar, Punjab                                  | Plain      |
| 32.     | Jeevan Jyoti     | Burdwan, West Bengal                               | Plain      |
| 33.     | JG 12            | Karbi Anglong, Assam                               | Hill       |
| 34.     | JG-1             | East Khasi hills, Meghalaya                        | Hill       |
| 35.     | JG-22            | Jammu & Kashmir                                    | Hill       |
| 36.     | JG-25            | Kangra, Himachal Pradesh                           | Hill       |
| 37.     | JG-27            | Chamba, Himachal Pradesh                           | Hill       |
| 38.     | JG-56            | Chamba, Himachal Pradesh                           | Hill       |
| 39.     | K-22             | Midnapore, West Bengal; Farrukhabad, Uttar Pradesh | Plain      |
| 40.     | Kacha Bhutia     | Gangtok, Sikkim                                    | Hill       |
| 41.     | Kala Aloo        | Lahaul-Spiti, Himachal Pradesh                     | Hill       |
| 42.     | Kanpuria Safed   | Kanpur, Uttar Pradesh                              | Plain      |
| 43.     | KP/PC-292        | Nakodar, Punjab                                    | Plain      |
| 44.     | Lah Arpor        | Shillong, Meghalaya                                | Hill       |
| 45.     | Lah Ipon         | Shillong, Meghalaya                                | Hill       |
| 46.     | Lah Polin        | Shillong, Meghalaya                                | Hill       |
| 47.     | Lah Sarkari      | Tura, Meghalaya                                    | Hill       |
| 48.     | Lah Saw          | Shillong, Meghalaya                                | Hill       |
| 49.     | Lah Saw Khasi    | Tura, Meghalaya                                    | Hill       |
| 50.     | Lah Saw Smit     | Shillong, Meghalaya                                | Hill       |
| 51.     | Lah Synthiew     | Shillong, Meghalaya                                | Hill       |
| 52.     | Lah Tora         | Shillong, Meghalaya                                | Hill       |
| 53.     | Lal Ankh         | Jorhat, Assam                                      | Hill       |
| 54.     | Lal Gulab        | Farrukhabad, Uttar Pradesh                         | Plain      |
| 55.     | Lal Laukar       | Mau, Madhya Pradesh                                | Plain      |
| 56.     | Lal Mitti 1      | Nalanda, Bihar                                     | Plain      |
| 57.     | Lal Mitti 2      | Nalanda, Bihar                                     | Plain      |
| 58.     | Nainital         | Kokrajhar, Assam                                   | Hill       |
| 59.     | NJ-12            | Kinnaur, Himachal Pradesh                          | Hill       |

|     |                     |                                                            |       |
|-----|---------------------|------------------------------------------------------------|-------|
| 60. | NJ-130              | Kinnaur, Himachal Pradesh                                  | Hill  |
| 61. | NJ-23               | Kinnaur , Himachal Pradesh                                 | Hill  |
| 62. | NJ-2303             | Kinnaur, Himachal Pradesh                                  | Hill  |
| 63. | NJ-42               | Kinnaur, Himachal Pradesh                                  | Hill  |
| 64. | NJ-47               | Kinnaur, Himachal Pradesh                                  | Hill  |
| 65. | NJ-56               | Chamba , Himachal Pradesh                                  | Hill  |
| 66. | NJ-62               | Chamba, Himachal Pradesh                                   | Hill  |
| 67. | NJ-75               | Chamba , Himachal Pradesh                                  | Hill  |
| 68. | NJ-78               | Chamba , Himachal Pradesh                                  | Hill  |
| 69. | NJ-84               | Chamba, Himachal Pradesh                                   | Hill  |
| 70. | ON-1645             | Birbhum, West Bengal; Khajuri & Farrukhabad, Uttar Pradesh | Plain |
| 71. | PH/C-11             | NA                                                         | NA    |
| 72. | Phulwa Red          | Jorhat, Assam                                              | Hill  |
| 73. | Phulwa Red Splashed | Jorhat, Assam                                              | Hill  |
| 74. | Phulwa White        | Jorhat, Assam                                              | Hill  |
| 75. | Pimpernell          | Midnapore, West Bengal                                     | Plain |
| 76. | PS-4904             | Patna, Bihar                                               | Plain |
| 77. | PSK-76              | Basti, Uttar Pradesh                                       | Plain |
| 78. | R-1                 | Samastipur, Bihar                                          | Plain |
| 79. | R-2                 | Samastipur, Bihar                                          | Plain |
| 80. | R-3                 | Samastipur, Bihar                                          | Plain |
| 81. | Rangpuria           | Cooch Behar, West Bengal                                   | Hill  |
| 82. | Red Flesh           | Patna, Bihar                                               | Plain |
| 83. | Sathoo              | Kinnaur & Chamba, Himachal Pradesh                         | Hill  |
| 84. | Sisa Pani           | Patna, Bihar                                               | Plain |
| 85. | Ultimus             | Farrukhabad, Uttar Pradesh                                 | Plain |
| 86. | UP to Date          | Kinnaur, Himachal Pradesh; Kokrajhar, Assam                | Hill  |
| 87. | V2-2912             | Shimla, Himachal Pradesh                                   | Hill  |
| 88. | Var 3797            | Allahabad, Uttar Pradesh                                   | Plain |
| 89. | VB-8                | Shimla, Himachal Pradesh                                   | Hill  |
| 90. | VK/JG-1             | Chamba, Himachal Pradesh                                   | Hill  |
| 91. | VK/JG-2             | Chamba, Himachal Pradesh                                   | Hill  |
| 92. | 1001                | Nakodar, Punjab                                            | Plain |
| 93. | 1007                | Nakodar, Punjab                                            | Plain |
| 94. | 1591/11             | Midnapore, West Bengal                                     | Plain |
