# Supplementary material for: Resistance Evaluation for Native Potato Accessions against Late Blight Disease and Potato Cyst Nematodes by Molecular Markers and Phenotypic Screening in India
Source: MDPI journal article supplement (doi:10.3390/life13010033), 2022-12-23
Supplement: s1 [file s1]

**Supplementary file S1. DNA amplification profile of two PCN resistance gene linked markers Gro 1-4-1<sub>602</sub> and HC<sub>276</sub>**

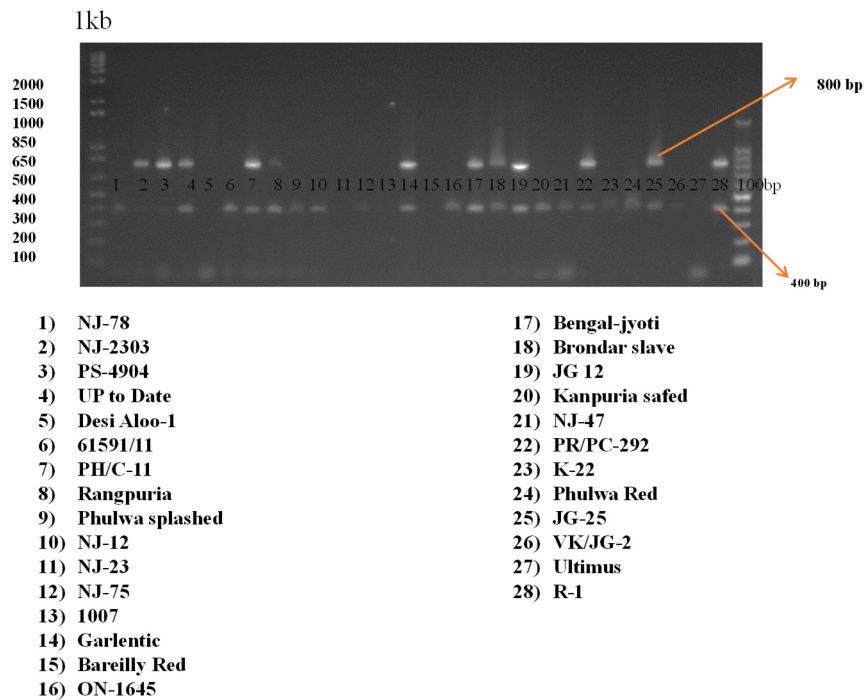

**Marker Gro 1-4-1**

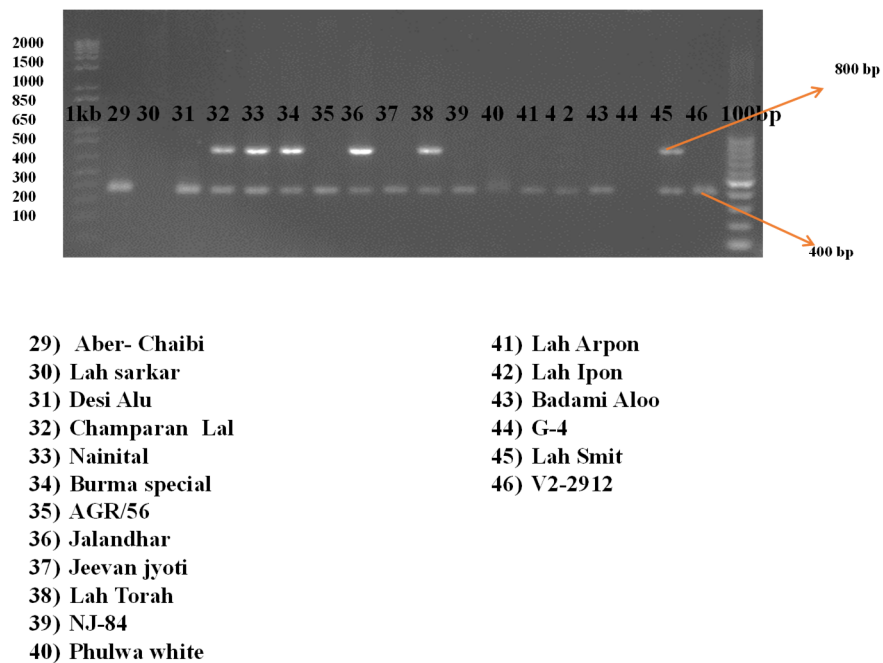

**Marker Gro 1-4-1**

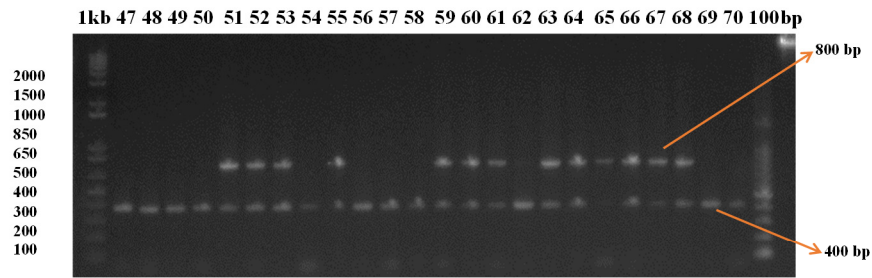

- |                  |                      |
|------------------|----------------------|
| 47) Kacha Bhutia | 61) Var 3797         |
| 48) Lal Mutti 2  | 62) Sisapani         |
| 49) Desi No. 2   | 63) Sathoo           |
| 50) Alpha        | 64) JG-56            |
| 51) Lah Saw      | 65) R-2              |
| 52) Clone 1      | 66) NJ-42            |
| 53) Lal Laukar   | 67) Lah Saw Khasi    |
| 54) Lal Ankh     | 68) Australian White |
| 55) Lal Mutti 1  | 69) Dhankari         |
| 56) Bhura Aloo   | 70) Red flesh        |
| 57) NJ-62        |                      |
| 58) C-9-Patna    |                      |
| 59) Pimpernell   |                      |
| 60) Dehati Aloo  |                      |

#### Marker Gro 1-4-1

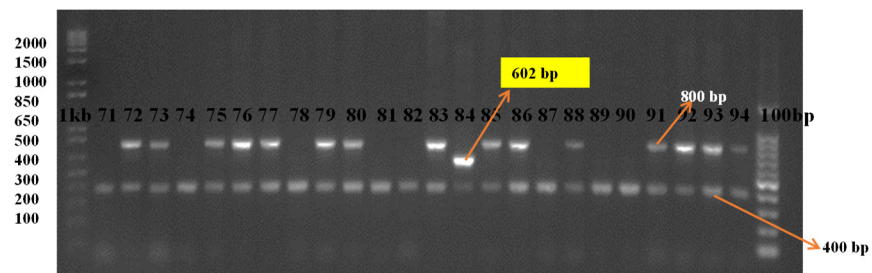

- |                  |                     |
|------------------|---------------------|
| 71) 1001         | 84) JG-1            |
| 72) Beeta        | 85) Dwarf culture   |
| 73) JG-27        | 86) Gulmarg special |
| 74) Aruconia     | 87) Lal agulab      |
| 75) NJ-56        | 88) R-3             |
| 76) Assamia Aloo | 89) Deshla Lal      |
| 77) Lah Synthiew | 90) Kala Aloo       |
| 78) Amaraj Hatti | 91) NJ-130          |
| 79) VK/JG-1      | 92) DRR Blue        |
| 80) Lah Polin    | 93) VB-8            |
| 81) Gulabia      | 94) JG-22           |
| 82) Hyb-3        |                     |
| 83) PSK-76       |                     |

#### Marker Gro 1-4-1

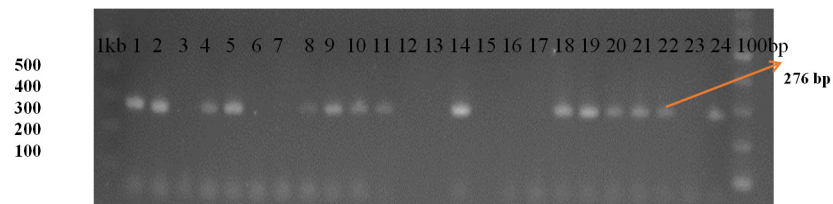

- |                    |                    |
|--------------------|--------------------|
| 1. NJ-78           | 15. Bareilly Red   |
| 2. NJ-2303         | 16. ON-1645        |
| 3. PS-4904         | 17. Bengal-jyoti   |
| 4. UP to Date      | 18. Brondar slave  |
| 5. Desi Aloo-1     | 19. JG 12          |
| 6. 61591/11        | 20. Kanpuria safed |
| 7. PH/C-11         | 21. NJ-47          |
| 8. Rangpuria       | 22. PR/PC-292      |
| 9. Phulwa splashed | 23. K-22           |
| 10. NJ-12          | 24. Phulwa Red     |
| 11. NJ-23          |                    |
| 12. NJ-75          |                    |
| 13. 1007           |                    |
| 14. Garlentic      |                    |

### Marker HC<sub>276</sub> (PCN)

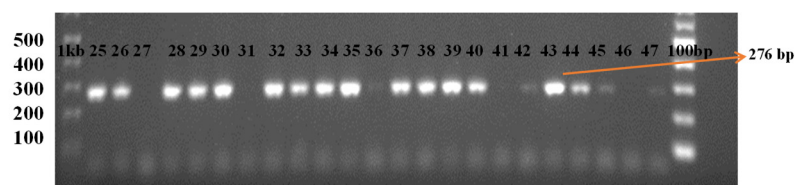

- |                   |                  |
|-------------------|------------------|
| 25) JG-25         | 40) Phulwa white |
| 26) VK/JG-2       | 41) Lah Arpon    |
| 27) Ultimius      | 42) Lah Ipon     |
| 28) R-1           | 43) Badami Aloo  |
| 29) Aber- Chaibi  | 44) G-4          |
| 30) Lah sarkar    | 45) Lah Smit     |
| 31) Desi Alu      | 46) V2-2912      |
| 32) Champaran Lal | 47) Kacha Bhutia |
| 33) Nainital      |                  |
| 34) Burma special |                  |
| 35) AGR/56        |                  |
| 36) Jalandhar     |                  |
| 37) Jeevan jyoti  |                  |
| 38) Lah Torah     |                  |
| 39) NJ-84         |                  |

### Marker HC<sub>276</sub> (PCN)

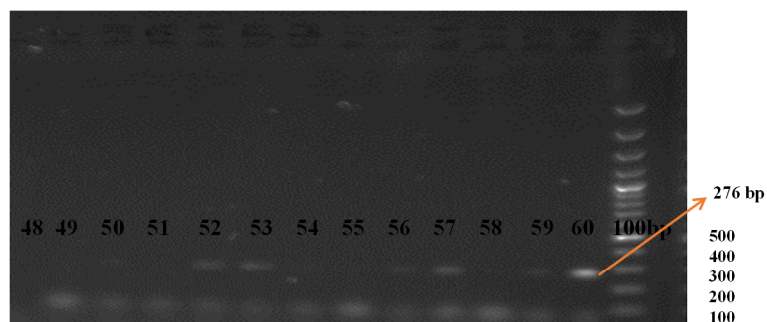

48) Lal Mutti 2  
49) Desi No. 2  
50) Alpha  
51) Lah Saw  
52) Clone 1  
53) Lal Laukar  
54) Lal Ankh  
55) Lal Mutti 1  
56) Bhura Aloo  
57) NJ-62  
58) C-9-Patna

59) Pimpernell  
60) Dehati Aloo

### Marker HC<sub>276</sub> (PCN)

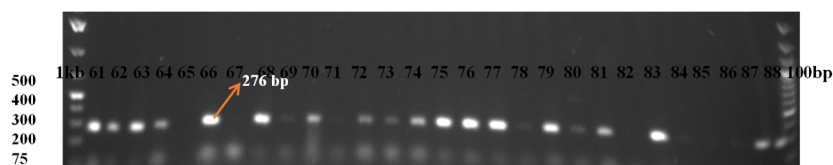

61) Var 3797  
62) Sisapani  
63) Sathoo  
64) JG-56  
65) R-2  
66) NJ-42  
67) Lah Saw Khasi  
68) Australian White  
69) Dhankari  
70) Red flesh  
71) 1001  
72) Beeta  
73) JG-27  
74) Aruconia  
75) NJ-56  
76) Assamia Aloo  
77) Lah Synthiew  
78) Amaraj Hatti  
79) VK/JG-1

80) Lah Polin  
81) Gulabia  
82) Hyb-3  
83) PSK-76  
84) JG-1  
85) Dwarf culture  
86) Gulmarg special  
87) Lal agulab  
88) R-3

### Marker HC<sub>276</sub> (PCN)

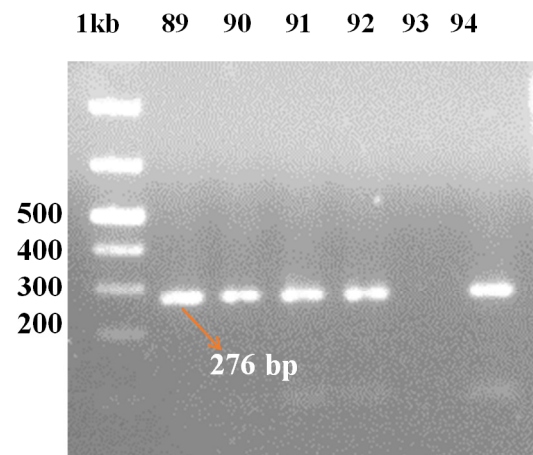

89) Deshla Lal  
90) Kala Aloo  
91) NJ-130  
92) DRR Blue  
93) VB-8  
94) JG-22

**Marker HC<sub>276</sub> (PCN)**
